# Supplementary material for: TeLLAgent: a dual-agent framework for reliable scientific discovery with tool-enhanced LLMs
Source: Royal Society of Chemistry journal article supplement (doi:10.1039/d5sc09883a), 2026-05-22
Supplement: d5sc09883a1.pdf [file d5sc09883a1.pdf]

1 **Supplementary Information**

2

3 **TeLLAgent: A Dual-Agent Framework for Reliable Scientific Discovery with Tool-**  
4 **Enhanced LLMs**

5 Jinyu Sun<sup>1</sup>, Jibin Zhou<sup>2</sup>, Huabei Wang<sup>1</sup>, Wei Liu<sup>1</sup>, Jun Yuan<sup>1</sup>, Yue Wang<sup>1</sup>, Ting Xie<sup>1</sup>, Lin Tan<sup>1</sup>,  
6 Hailiang Zhang<sup>1</sup>, Yingping Zou<sup>1</sup>, Zhimin Zhang<sup>1,\*</sup>, Hongmei Lu<sup>1,\*</sup>

7 <sup>1</sup>College of Chemistry and Chemical Engineering, Central South University, Changsha, 410083, P. R. China.

8 <sup>2</sup>Dalian Institute of Chemical Physics, Chinese Academy of Science, Dalian, 116023, P. R. China.

9

E-mail: hongmeilu@csu.edu.cn, zmzhang@csu.edu.cn

10 **Table of Contents**

|    |                                                                                                                                  |    |
|----|----------------------------------------------------------------------------------------------------------------------------------|----|
| 11 | <b>Supplementary Tables</b> .....                                                                                                | 2  |
| 12 | Table S1. The introduction of context engineering .....                                                                          | 2  |
| 13 | Table S2. List of questions used for model evaluation .....                                                                      | 3  |
| 14 | Table S3. Assessment rubrics of human experts for hallucination evaluation. ....                                                 | 4  |
| 15 | Table S4. Assessment rubrics of human experts for completeness, scientific rigor, and temporal<br>16 relevance. ....             | 5  |
| 17 | Table S5. Assessment rubrics of human experts for multimodal chemical information<br>18 processing. ....                         | 6  |
| 19 | Table S6. The evaluation results of multimodal chemical information processing ability. ....                                     | 8  |
| 20 | Table S7. The significance test of the difference between TeLLAgent, SciToolAgent and GPT-<br>21 5.....                          | 9  |
| 22 | Table S8. The comparison of different models.....                                                                                | 10 |
| 23 | Table S9. The tasks with different tool-calling steps.....                                                                       | 11 |
| 24 | Table S10. Main root causes of failures for the single-agent baseline .....                                                      | 13 |
| 25 | Table S11. The comparison of TeLLAgent with other models for PCE prediction .....                                                | 14 |
| 26 | <b>Supplementary Figures</b> .....                                                                                               | 15 |
| 27 | <b>Fig. S1.</b> Knowledge enhancement module. ....                                                                               | 15 |
| 28 | <b>Fig. S2.</b> The generation results of TeLLAgent, GPT-5 and SciToolAgent for tasks 1, 5, and 6<br>29 .....                    | 16 |
| 30 | <b>Fig. S3.</b> Comparison of TeLLAgent and GPT-5 generation results evaluated by Claude 4<br>31 Sonnet and Gemini 2.5 Pro. .... | 17 |
| 32 | <b>Fig. S4.</b> The comparison of GPT-4-0613-based on single-agent and dual-agent systems. ....                                  | 18 |
| 33 | <b>Fig. S5.</b> The analysis of token usage and cost of TeLLAgent and GPT-5. ....                                                | 18 |
| 34 | <b>Fig. S6.</b> Overview of the DonorGen.....                                                                                    | 19 |
| 35 | <b>Fig. S7.</b> The self-correction loop of material generation.....                                                             | 20 |
| 36 | <b>Fig. S8.</b> Chain of thought reasoning loop.....                                                                             | 21 |
| 37 | <b>Fig. S9.</b> Retrieval-augmented generation. ....                                                                             | 21 |
| 38 | <b>Supplementary Notes</b> .....                                                                                                 | 22 |
| 39 | <b>Supplementary note 1</b> .....                                                                                                | 22 |
| 40 | <b>Supplementary note 2</b> .....                                                                                                | 22 |
| 41 | <b>Supplementary note 3</b> .....                                                                                                | 25 |
| 42 | <b>Supplementary note 4</b> .....                                                                                                | 26 |
| 43 | <b>Supplementary note 5</b> .....                                                                                                | 30 |

44

## 1 Supplementary Tables

2 Table S1. The introduction of context engineering

| Information       | Definitions                                                                                                                                                                                                                                                                 |
|-------------------|-----------------------------------------------------------------------------------------------------------------------------------------------------------------------------------------------------------------------------------------------------------------------------|
| System prompt     | An initial set of instructions that defines the behavior.<br><i>"You are an AI system called TeLLAgent, and your task is to respond to the question or solve the problem to the best of your ability using the provided tools. "</i>                                        |
| User prompt       | Immediate task or question from the user.<br><i>e.g., "Introduce the history of Y6. "</i>                                                                                                                                                                                   |
| Short-term Memory | The conversation, including user and model responses.<br><i>e.g., previous interactions and conversations</i>                                                                                                                                                               |
| Long-Term Memory  | Persistent knowledge base and facts, it has been told for future use.<br><i>e.g., "Does the question contain the molecule, CAS, or molecular graph? if so, as a first step, you should consider whether it needs to convert the graph, name, or CAS number to SMILES. "</i> |
| Available Tools   | Definitions of all the functions or built-in tools.<br><i>e.g., SMILES2Weight: "Input SMILES, returns molecular weight."</i>                                                                                                                                                |
| Structured Output | Definitions of the format of the model's response                                                                                                                                                                                                                           |

3

4

5

Table S2. List of questions used for model evaluation

| Tasks                                                    | Questions                                                                                                                                                                                                                                                                                                                                                                                                                                                                                                                                                                                                                                                                                                     |
|----------------------------------------------------------|---------------------------------------------------------------------------------------------------------------------------------------------------------------------------------------------------------------------------------------------------------------------------------------------------------------------------------------------------------------------------------------------------------------------------------------------------------------------------------------------------------------------------------------------------------------------------------------------------------------------------------------------------------------------------------------------------------------|
| <b>Tasks of OSC basic knowledge</b>                      | <ol style="list-style-type: none"> <li>1. The history and development of Y6. Design principles behind Y6.</li> <li>2. Key issues must be considered when designing asymmetric donors to achieve the commercial application of asy-OSCs.</li> <li>3. Functions of interfacial layers in organic solar cells and basic principles of interfacial materials design.</li> <li>4. Working Principles of NanoIR-AFM technology and instrumentation. The primary challenges faced by the application of NanoIR-AFM that may limit its applicability in specific situations are.</li> <li>5. List some representative organic solar cell small and polymer materials with near-infrared region II response</li> </ol> |
| <b>Tasks of recent research advances in OSC</b>          | <ol style="list-style-type: none"> <li>6. The advantage of machine learning for the development of materials. What's the DeepAcceptor?</li> <li>7. The concept and advantages of quasi-macromolecules.</li> <li>8. Structures, properties, and applications of benzodithiophene derivatives</li> <li>9. Material degradation pathways in the photoactive layer. How to mitigate the material degradation</li> </ol>                                                                                                                                                                                                                                                                                           |
| <b>Tasks of material and device optimization studies</b> | <ol style="list-style-type: none"> <li>10. Different solvents influence factors for morphology control</li> <li>11. What we can learn from the A-DA'D-A type NFA design when we design NFAs</li> <li>12. Some aspects still need further investigation of the random copolymerization strategy of polymer photovoltaic materials</li> </ol>                                                                                                                                                                                                                                                                                                                                                                   |

Table S3. Assessment rubrics of human experts for hallucination evaluation.

| Dimension                             | Definition & Examples                                                                                                                                                                                                                                                                                                                                                                                                                                                                                                                    | Weight | Scoring Criteria                                                                                                                                                                                                                                                                                                                                                                                                                                                                                                                                                                                                                                  |
|---------------------------------------|------------------------------------------------------------------------------------------------------------------------------------------------------------------------------------------------------------------------------------------------------------------------------------------------------------------------------------------------------------------------------------------------------------------------------------------------------------------------------------------------------------------------------------------|--------|---------------------------------------------------------------------------------------------------------------------------------------------------------------------------------------------------------------------------------------------------------------------------------------------------------------------------------------------------------------------------------------------------------------------------------------------------------------------------------------------------------------------------------------------------------------------------------------------------------------------------------------------------|
| <b>Factuality<br/>Hallucination</b>   | <p><b>Definition:</b> The generation of content that is factually incorrect or unsupported by real-world information. This includes making up statistics, dates, names, events, or scientific facts.</p> <p><b>Examples:</b> If asked, "When was the Eiffel Tower built?", a hallucinated response might be "The Eiffel Tower was completed in 1900," when the correct year is 1889.</p>                                                                                                                                                 | 10/10  | <p><b>0-2: Severe Hallucination</b><br/>Response is overwhelmingly false; core facts are fabricated. making the response unreliable.</p> <p><b>3-5: Moderate Hallucination</b><br/>Significant factual errors</p> <p><b>6-7: Minor Hallucination</b><br/>Mostly correct, but with some verifiable errors.</p> <p><b>8-10: No Hallucination</b><br/>Response is entirely factual and verifiable.</p> <p><b>Excellence Standard (10):</b> All facts are correct and well-explained</p>                                                                                                                                                              |
| <b>Faithfulness<br/>Hallucination</b> | <p><b>Definition:</b> The generation of content that deviates from or contradicts the provided source material or prompt, even if the hallucinated content is factually correct in isolation.</p> <p><b>Example:</b> If a document states "The company's revenue increased by 10% in Q1," and the model responds "The company experienced a 15% revenue growth in the first quarter, driven by strong international sales," the "15%" and "strong international sales" are faithfulness hallucinations if not present in the source.</p> | 10/10  | <p><b>0-2: Severe Hallucination</b><br/>Response completely or significantly misrepresents the source/prompt.</p> <p><b>3-5: Moderate Hallucination</b><br/>Noticeable deviations from the source/prompt.</p> <p><b>6-7: Minor Hallucination</b><br/>Small inconsistencies or minor elaborations not directly stated but that don't contradict the core message of the source/prompt.</p> <p><b>8-10: No Hallucination</b><br/>Response is entirely consistent with and derivable from the provided source material or prompt.</p> <p><b>Excellence Standard (10):</b> Response strictly derives from input with zero unsupported inferences.</p> |

1 Table S4. Assessment rubrics of human experts for completeness, scientific rigor, and temporal  
 2 relevance.

| Dimension                                 | Definition & Examples                                                                                                                                                                                                                                                                                                                                                  | Weight | Scoring Criteria                                                                                                                                                                                                                                                                    |
|-------------------------------------------|------------------------------------------------------------------------------------------------------------------------------------------------------------------------------------------------------------------------------------------------------------------------------------------------------------------------------------------------------------------------|--------|-------------------------------------------------------------------------------------------------------------------------------------------------------------------------------------------------------------------------------------------------------------------------------------|
| <b>Precision &amp; Logical Soundness</b>  | <p>This dimension assesses the logical coherence of its presentation.</p> <p><b>Example:</b> If discussing a scientific principle, are the steps in a process presented in a correct and understandable sequence?</p>                                                                                                                                                  | 4/10   | <p><b>10:</b> Logically seamless + precisely articulated.</p> <p><b>7.5:</b> Logically sound with minor jumps or imprecision in wording.</p> <p><b>5:</b> Logically unclear, contradictory, or confusing in structure.</p> <p><b>2.5:</b> Fundamentally illogical + incoherent.</p> |
| <b>Completeness &amp; Technical Depth</b> | <p>This dimension evaluates the extent to which the response covers all necessary aspects of the prompt and demonstrates a sound understanding of underlying technical concepts.</p> <p><b>Example:</b> If asked to describe a machine, does it cover all essential components and their functions? Is the underlying engineering principles explained adequately?</p> | 4/10   | <p><b>10:</b> Comprehensive coverage + advanced technical insights</p> <p><b>7.5:</b> Key elements addressed + basic mechanisms explained</p> <p><b>5:</b> Superficial/gapped technical treatment</p> <p><b>2.5:</b> Missing core concepts or technically invalid</p>               |
| <b>Temporal Relevance</b>                 | <p>This dimension assesses whether the information presented in the response is current and up-to-date.</p> <p><b>Example:</b> If discussing a rapidly evolving technology, is the information reflective of recent advancements or outdated concepts?</p>                                                                                                             | 2/10   | <p><b>10:</b> Current knowledge</p> <p><b>7.5:</b> Relies on mainstream knowledge (2-3 yrs)</p> <p><b>5:</b> Outdated or unverified content</p> <p><b>2.5:</b> Obsolete or disproven information</p>                                                                                |

3  
4

1 Table S5. Assessment rubrics of human experts for multimodal chemical information processing.

| Dimension                             | Specific Test Task                                                                                                                                            | Weight                                                                                                                                                         | Scoring Criteria                                                                                                                                                 |
|---------------------------------------|---------------------------------------------------------------------------------------------------------------------------------------------------------------|----------------------------------------------------------------------------------------------------------------------------------------------------------------|------------------------------------------------------------------------------------------------------------------------------------------------------------------|
| Category                              |                                                                                                                                                               | Document parsing                                                                                                                                               |                                                                                                                                                                  |
| 1. Document parsing and Summarization | Upload a PDF: "Sci. China Chem. 65, 1374-1382 (2022)".<br>Ask: "Please summarize the core contribution and main findings of this paper."                      | 1/8                                                                                                                                                            | 10: Perfectly summarizes all key points<br>5: Correct core contribution but with factual errors in details<br>1: Completely incorrect summary                    |
|                                       | 2. Multi-document retrieval                                                                                                                                   | Upload 50 PDFs. Ask: "What is the role of functionalized $\pi$ -bridge in quasi-macromolecule"                                                                 | 1/8                                                                                                                                                              |
| Category                              |                                                                                                                                                               | Diagram Comprehension                                                                                                                                          |                                                                                                                                                                  |
| 3. Interpretation of Diagrams         | Upload a diagram Figure 2 in "npj Computational Materials 10: 181 (2024)".<br>Ask: "Describe the rationale and innovation of the model."                      | 1/8                                                                                                                                                            | 10: Accurately describes model architecture and innovations<br>5: Describes basic framework but omits key innovations<br>1: Completely misinterprets the diagram |
|                                       | 4. Extraction of data                                                                                                                                         | Upload a current density-voltage curve. Figure 2(a) in "Joule, 3 (4), 1140-1151 (2019)"<br>Ask: "Extract the photovoltaic parameters from the image."          | 1/8                                                                                                                                                              |
| Category                              |                                                                                                                                                               | Molecular Structure Recognition                                                                                                                                |                                                                                                                                                                  |
| 5. Functional group analysis          | Upload a molecular structure. Figure 1(a) in "Joule, 3 (4), 1140-1151 (2019) "<br>Ask: "According to this image, list the functional groups in the material?" | 1/8                                                                                                                                                            | 10: Correctly identifies all functional groups<br>5: Only identifies basic functional groups<br>1: Completely incorrect identification                           |
|                                       | 6. 2D Structure Recognition                                                                                                                                   | Upload a clean, standard image of a chemical structure. Figure 1(a) in "Joule, 3 (4), 1140-1151 (2019)"<br>Ask: "Please identify the SMILES of this molecule." | 1/8                                                                                                                                                              |

| Category                    | Code Generation                                                                                                                  |     |                                                                                                                                                          |
|-----------------------------|----------------------------------------------------------------------------------------------------------------------------------|-----|----------------------------------------------------------------------------------------------------------------------------------------------------------|
| 7. Simple code generation   | Instruct: "Using Python and the RDKit library, write a function that takes a SMILES string as input and returns its TPSA value." | 1/8 | 10: Efficient implementation with comprehensive error handling<br>5: Partial functionality implemented<br>1: Contains syntax errors preventing execution |
| 8. Reproduction of the code | Upload a text about the model. Ask: "Using Python, reproduce the code of the model"                                              | 1/8 | 10: Complete reproduction with documentation<br>5: Key architecture correctly implemented<br>1: Unable to reproduce                                      |

1

2

3

1 Table S6. The evaluation results of multimodal chemical information processing ability.

|                                | Category                           | Expert 1                           | Expert 2 | Expert 3 | Expert 4 | Gemini 2.5 Pro | Claude 4 Sonnet | Average score |     |      |
|--------------------------------|------------------------------------|------------------------------------|----------|----------|----------|----------------|-----------------|---------------|-----|------|
| <b>TeLLAgent</b>               | Document parsing and Summarization | 10                                 | 10       | 5        | 10       | 9              | 9               | 8.65          |     |      |
|                                | Multi-document retrieval           | 10                                 | 10       | 10       | 10       | 9              | 9               |               |     |      |
|                                | Interpretation of Diagrams         | 10                                 | 5        | 10       | 10       | 8.5            | 8.5             |               |     |      |
|                                | Analysis of Performance Curves     | 5                                  | 5        | 5        | 5        | 8              | 8               |               |     |      |
|                                | Functional group analysis          | 10                                 | 10       | 10       | 10       | 10             | 9               |               |     |      |
|                                | 2D Structure Recognition           | 10                                 | 10       | 10       | 10       | 10             | 10              |               |     |      |
|                                | Simple code generation             | 10                                 | 10       | 10       | 10       | 9.5            | 9.5             |               |     |      |
|                                | Reproduction of the code           | 5                                  | 5        | 5        | 5        | 9              | 9               |               |     |      |
|                                | <b>GPT-5</b>                       | Document parsing and Summarization | 10       | 10       | 5        | 10             | 9               |               | 8.5 | 5.96 |
|                                |                                    | Multi-document retrieval           | 1        | 1        | 1        | 1              | 0               |               | 0   |      |
| Interpretation of Diagrams     |                                    | 10                                 | 5        | 10       | 10       | 8.5            | 8.5             |               |     |      |
| Analysis of Performance Curves |                                    | 5                                  | 5        | 5        | 5        | 8              | 8               |               |     |      |
| Functional group analysis      |                                    | 5                                  | 5        | 10       | 5        | 9              | 8               |               |     |      |
| 2D Structure Recognition       |                                    | 1                                  | 1        | 1        | 1        | 0              | 1               |               |     |      |
| Simple code generation         |                                    | 10                                 | 10       | 10       | 10       | 9              | 9               |               |     |      |
| Reproduction of the code       |                                    | 5                                  | 5        | 5        | 5        | 8.5            | 8               |               |     |      |

2

3

1 Table S7. The significance test of the difference between TeLLAgent, SciToolAgent and GPT-5

|                                                        | Friedman test          | Wilcoxon Signed-Rank Test |                               |                           |
|--------------------------------------------------------|------------------------|---------------------------|-------------------------------|---------------------------|
|                                                        | adjusted p-value       | adjusted p-value          |                               |                           |
|                                                        |                        | TeLLAgent vs.<br>GPT-5    | TeLLAgent vs.<br>SciToolAgent | GPT-5 vs.<br>SciToolAgent |
| Factuality hallucinations                              | $1.23 \times 10^{-4}$  | $1.73 \times 10^{-4}$     | $8.09 \times 10^{-3}$         | $1.89 \times 10^{-3}$     |
| Faithfulness hallucinations                            | 0.062                  | 0.436                     | 0.078                         | 0.636                     |
| Completeness, scientific rigor, and temporal relevance | $2.79 \times 10^{-13}$ | $5.83 \times 10^{-9}$     | $5.87 \times 10^{-5}$         | $8.95 \times 10^{-7}$     |
| Multimodal chemical information processing             | N/A                    | $3.00 \times 10^{-5}$     | N/A                           | N/A                       |

1 Table S8. The comparison of different models

|                                                                | Model                | Mean | SD   | 95% CI        |
|----------------------------------------------------------------|----------------------|------|------|---------------|
| Factuality score                                               | TeLLAgent (DeepSeek) | 8.86 | 0.34 | [8.72, 9.00]  |
|                                                                | TeLLAgent (GPT-5)    | 8.90 | 0.31 | [8.58, 9.20]  |
|                                                                | ChemCrow             | 8.15 | 0.19 | [7.95, 8.36]  |
|                                                                | SciToolAgent         | 8.57 | 0.24 | [8.47, 8.67]  |
|                                                                | GPT-5                | 8.08 | 0.21 | [7.99, 8.17]  |
| Faithfulness score                                             | TeLLAgent (DeepSeek) | 8.91 | 0.23 | [8.82, 9.00]  |
|                                                                | TeLLAgent (GPT-5)    | 8.90 | 0.13 | [8.77, 9.04]  |
|                                                                | ChemCrow             | 8.35 | 0.31 | [8.03, 8.67]  |
|                                                                | SciToolAgent         | 8.73 | 0.16 | [8.66, 8.80]  |
|                                                                | GPT-5                | 8.71 | 0.19 | [8.63, 8.79]  |
| Completeness, scientific rigor, and temporal relevance (Human) | TeLLAgent (DeepSeek) | 8.63 | 0.28 | [8.46, 8.81]  |
|                                                                | TeLLAgent (GPT-5 )   | 8.60 | 0.28 | [8.43, 8.78]  |
|                                                                | ChemCrow             | 7.27 | 0.65 | [6.86, 7.68]  |
|                                                                | SciToolAgent         | 8.33 | 0.43 | [8.06, 8.60]  |
|                                                                | GPT-5                | 7.57 | 0.80 | [7.07, 8.08]  |
| completeness, scientific rigor, and temporal relevance (LLMs)  | TeLLAgent (DeepSeek) | 8.80 | 0.43 | [8.53, 9.07]  |
|                                                                | TeLLAgent (GPT-5 )   | 8.81 | 0.41 | [8.55, 9.07]  |
|                                                                | ChemCrow             | 7.36 | 0.65 | [6.95, 7.78]  |
|                                                                | SciToolAgent         | 8.23 | 0.52 | [7.90, 8.56]  |
|                                                                | GPT-5                | 7.74 | 0.93 | [7.15, 8.33]  |
| Multimodal chemical information processing                     | TeLLAgent (DeepSeek) | 8.65 | 1.61 | [7.30, 9.99]  |
|                                                                | TeLLAgent (GPT-5 )   | 8.64 | 1.65 | [7.25, 10.02] |
|                                                                | GPT-5                | 6.08 | 3.53 | [3.13, 9.03]  |

2

3

Table S9. The tasks with different tool-calling steps.

| Steps | Tasks                                                                                                                                                                                                                                                                         | Excellence Standard                                                                                                             |
|-------|-------------------------------------------------------------------------------------------------------------------------------------------------------------------------------------------------------------------------------------------------------------------------------|---------------------------------------------------------------------------------------------------------------------------------|
| 1     | Upload an image. Write the code according to the image                                                                                                                                                                                                                        | Imageanalysis                                                                                                                   |
|       | Upload a PDF. What is the main point of this paper?                                                                                                                                                                                                                           | PDFreader                                                                                                                       |
| 3     | Upload a molecular image. Predict the logP and SAScore of the acceptor.                                                                                                                                                                                                       | Graphconverter<br>MOL2LogP<br>MOL2SAScore                                                                                       |
|       | Generate a donor with PCE=10% and evaluate the performance of the donor.                                                                                                                                                                                                      | DonorGen<br>MOL2Properties<br>Donor_predictor                                                                                   |
| 5     | The SMILES, history and development of Y6                                                                                                                                                                                                                                     | Mol2SMILES<br>RAG<br>WebSearch<br>Wikipedia<br>LiteratureSearch                                                                 |
|       | Upload a molecular image. Evaluate the performance of the acceptor and list its functional groups.                                                                                                                                                                            | Graphconverter<br>MOL2Properties<br>Acceptor_predictor<br>HomoLumo_predictor<br>FuncGroups                                      |
| 7     | Upload a molecular image. Choose the acceptor with the max PCE among the three acceptors as follows, and calculation the similarity of the chosen molecule with 2304444-49-1<br>acceptor 1 is [SMILES1]<br>acceptor 2 is [IUPAC NAME1]<br>acceptor 3 is as the image provided | Graphconverter<br>CAS2SMILES<br>Acceptor_predictor<br>Acceptor_predictor<br>Acceptor_predictor<br>Query2SMILES<br>MolSimilarity |
|       | 1. Upload a dap.csv file containing one donor with different acceptors. Screen the efficient D/A pairs and write the code to calculate the TPSA from SMILES.<br>Then, ask human what to do next.<br>2. Obtain the CAS, LogP, molecular weight and name of the acceptor 1      | dap_screen<br>Code writer<br>Human<br>MOL2LogP<br>SMILES2CAS<br>SMILES2Name<br>Mol2MW                                           |
| >9    | 1. Generate a donor with PCE = 12% and give all its properties. Then, I will give you three acceptors, and give me the best match donor/acceptor pairs.                                                                                                                       | DonorGen<br>MOL2Properties<br>HomoLumo_predictor<br>FuncGroups<br>Donor_predictor                                               |
|       | 2. acceptor 1 is [SMILES2]<br>acceptor 2 is [SMILES3]<br>acceptor 3 is [SMILES4]                                                                                                                                                                                              | Human<br>DAP_predictor<br>DAP_predictor<br>DAP_predictor                                                                        |
|       | What can we learn from PM6:Y6 analyzing in properties                                                                                                                                                                                                                         | Mol2SMILES                                                                                                                      |

---

and knowledge aspects?

Mol2SMILES  
MOL2Properties  
MOL2Properties  
HomoLumo\_predictor  
HomoLumo\_predictor  
Donor\_predictor  
Acceptor\_predictor  
DAP\_predictor  
RAG  
WebSearch  
Wikipedia  
LiteratureSearch

---

1  
2

1 Table S10. Main root causes of failures for the single-agent baseline

| Root Cause Category      | Sub-type                         | % of Failures | Example Observations                                                                                                      |
|--------------------------|----------------------------------|---------------|---------------------------------------------------------------------------------------------------------------------------|
| Tool Selection           | Incorrect tool selected          | 51.2%         | The agent picks a tool from the wrong domain (e.g., regression instead of classification).                                |
|                          | Hallucinated tool                | 2.3%          | The agent invokes a non-existent tool name, blending keywords from the prompt; parsing fails.                             |
|                          | No tool selected                 | 0%            | The agent fails to call any tools, generating a direct (often incorrect) answer.                                          |
| Tool Input Construction  | Incorrect/missing arguments      | 20.9%         | Arguments are malformed, missing, or do not match the tool's required schema, causing tool errors.                        |
| Tool Output Parsing      | Misinterpretation of tool result | 4.7%          | The tool returns a correct result but the agent misparses it, leading to an incorrect final answer.                       |
| LLM Constrained Decoding | Format violation                 | 2.3%          | Output does not follow the expected structured format (e.g., missing JSON keys), preventing tool invocation.              |
| Tool Set Issues          | Missing required tool            | 0%            | The available toolset lacks functionality needed for certain prompts; the agent either selects a suboptimal tool or none. |
| Tool Errors              | Faulty tool execution            | 18.6%         | A called tool itself fails (e.g., internal error) or returns low-quality output.                                          |

1 Table S11. The comparison of TeLLAgent with other models for PCE prediction

| Type                          | Models                                           | Predicted PCE | AE   |
|-------------------------------|--------------------------------------------------|---------------|------|
| Donor                         | TeLLAgent                                        | 15.83         | 0.76 |
|                               | <i>Sci. Adv.</i> , 2019, 5, eaay4275             | 7.92          | 7.15 |
|                               | <i>Nano Energy</i> , 2023, 106, 108108           | 10.09         | 4.98 |
|                               | GPT-5                                            | 14            | 1.07 |
|                               | Scharber model                                   | 5.57          | 9.5  |
| Quasi-macromolecular acceptor | TeLLAgent                                        | 16.07         | 0.37 |
|                               | <i>Cell Rep. Phys. Sci.</i> , 2024, 5(12),102316 | 12.98         | 3.46 |
|                               | <i>Nano Energy</i> , 2023, 106, 108108           | 14.8          | 1.64 |
|                               | GPT-5                                            | 18            | 1.56 |
|                               | Scharber model                                   | 7.81          | 8.63 |

2

3

# 1 Supplementary Figures

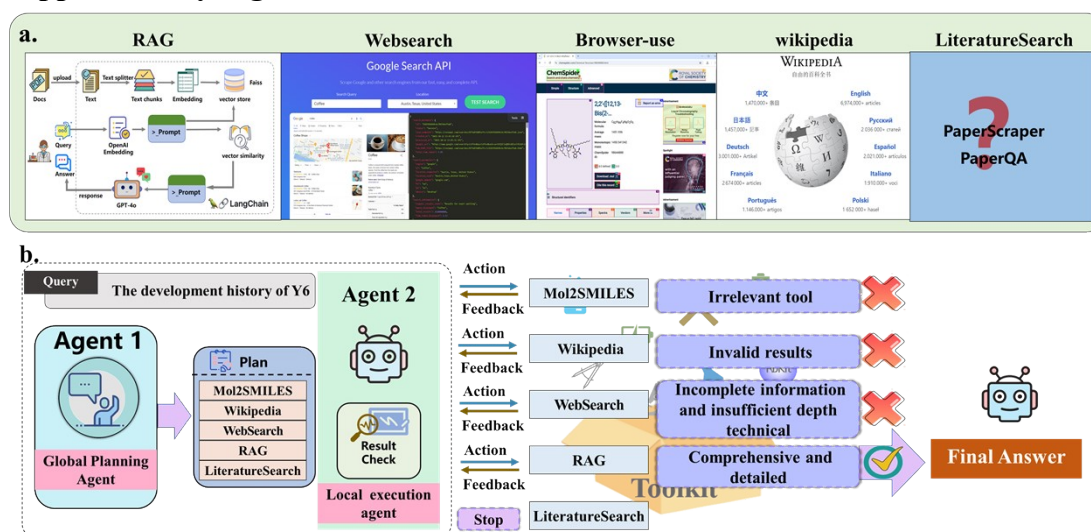

2  
 3 **Fig. S1.** Knowledge enhancement module. **a.** Knowledge enhancement tools. TeLLAgent actively  
 4 synthesizes information from multiple, independently retrieved sources to construct evidence-  
 5 based responses. Specifically, the RAG Module, exemplified with 1000 OSC-related publications  
 6 in this study, queries private datasets or user-created domain-specific databases. The Websearch  
 7 Module searches the public internet. The Browser-use tool launches a browser for detailed web  
 8 searches. The Wikipedia Module interfaces with the Wikipedia API. The LiteratureSearch Module  
 9 finds and summarizes pertinent literature. **b.** The chain-of-thought reasoning loop. The reasoning  
 10 loop of TeLLAgent can generate the answers by step-by-step reasoning and tool-calling. When the  
 11 irrelevant tool is called, TeLLAgent will re-plan and invoke other tools. The framework will  
 12 recheck the results until satisfactory results are obtained.  
 13

## Task 1

GPT-5: This history and development of Y6. Design Principles Behind Y6.

A: In organic solar cells (OSCs), the term "Y6" refers to a high-performance non-fullerene acceptor (NFA) molecule that has significantly advanced the field. Y6 was first reported in 2019 by Yuan et al. in [Nature Communications](#) → (Joule). It is a fused-ring electron acceptor .....

TeLLAgent: Y6 is a groundbreaking A-DA' D-A type non-fullerene acceptor (NFA) which gained attention for its high performance in organic solar cells (OSCs)...2017: Yingping Zou's group pioneered the A-DA' D-A framework by synthesizing BZIC, incorporating an electron-deficient dithieno[3,2-b]pyrrolobenzotriazole backbone. Post-2017: Building upon these advances, Y6 was designed by further optimizing the A-DA' D-A structure to achieve exceptional photovoltaic properties.

SciToolAgent: ..... The evolutionary process began with the conceptualization of the "Y-series" molecules. Early iterations focused on extending the conjugation length and introducing different heteroatoms into the fused core. The crowning achievement of this development phase was Y6.

## Task 5

GPT-5: Here are some representative organic solar cell materials with a near-infrared (NIR) region II response (700–1000+ nm) → (1000–1700 nm): .....

TeLLAgent: Here are some examples of small molecule and polymer organic solar cell (OSC) materials with near-infrared (NIR) region II (1000-1700 nm) response: .....

SciToolAgent: Representative organic solar cell small and polymer materials with near-infrared region II response include: .....

## Task 6

GPT-5: .....

DeepAcceptor is a deep-learning framework for discovering electron-acceptor materials—most commonly non-fullerene acceptor (NFA) molecules for organic photovoltaics. It typically uses [graph neural networks](#) → (BERT) trained on DFT and/or experimental data to predict acceptor-relevant properties (e.g., LUMO/electron affinity, optical gap, stability, reorganization energy) → (PCE) and then ranks or generates new acceptor candidates, often coupled with Bayesian optimization for inverse design. This lets researchers rapidly screen large molecular libraries and propose synthesizable acceptors with higher expected device performance.

TeLLAgent: .....

DeepAcceptor is a deep learning-based framework designed to accelerate the design and discovery of high-performance small-molecule non-fullerene acceptor (NFA) materials for organic solar cells (OSCs). It integrates advanced machine learning techniques to predict power conversion efficiencies (PCEs), leveraging a combination of graph representation learning through a Bidirectional Encoder Representations from Transformers (BERT)-based model, termed abcBERT.

SciToolAgent: .....

DeepAcceptor is a deep learning-based framework designed to aid in the design and discovery of highly efficient small molecule acceptor materials. It includes components for data collection and management, and a power conversion efficiency (PCE) predictor based on advanced neural network architectures like abcBERT.

1

2 Fig. S2. The generation results of TeLLAgent, GPT-5 and SciToolAgent for tasks 1, 5, and 6

## The advantage of machine learning for the development of materials. What's the DeepAcceptor?

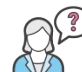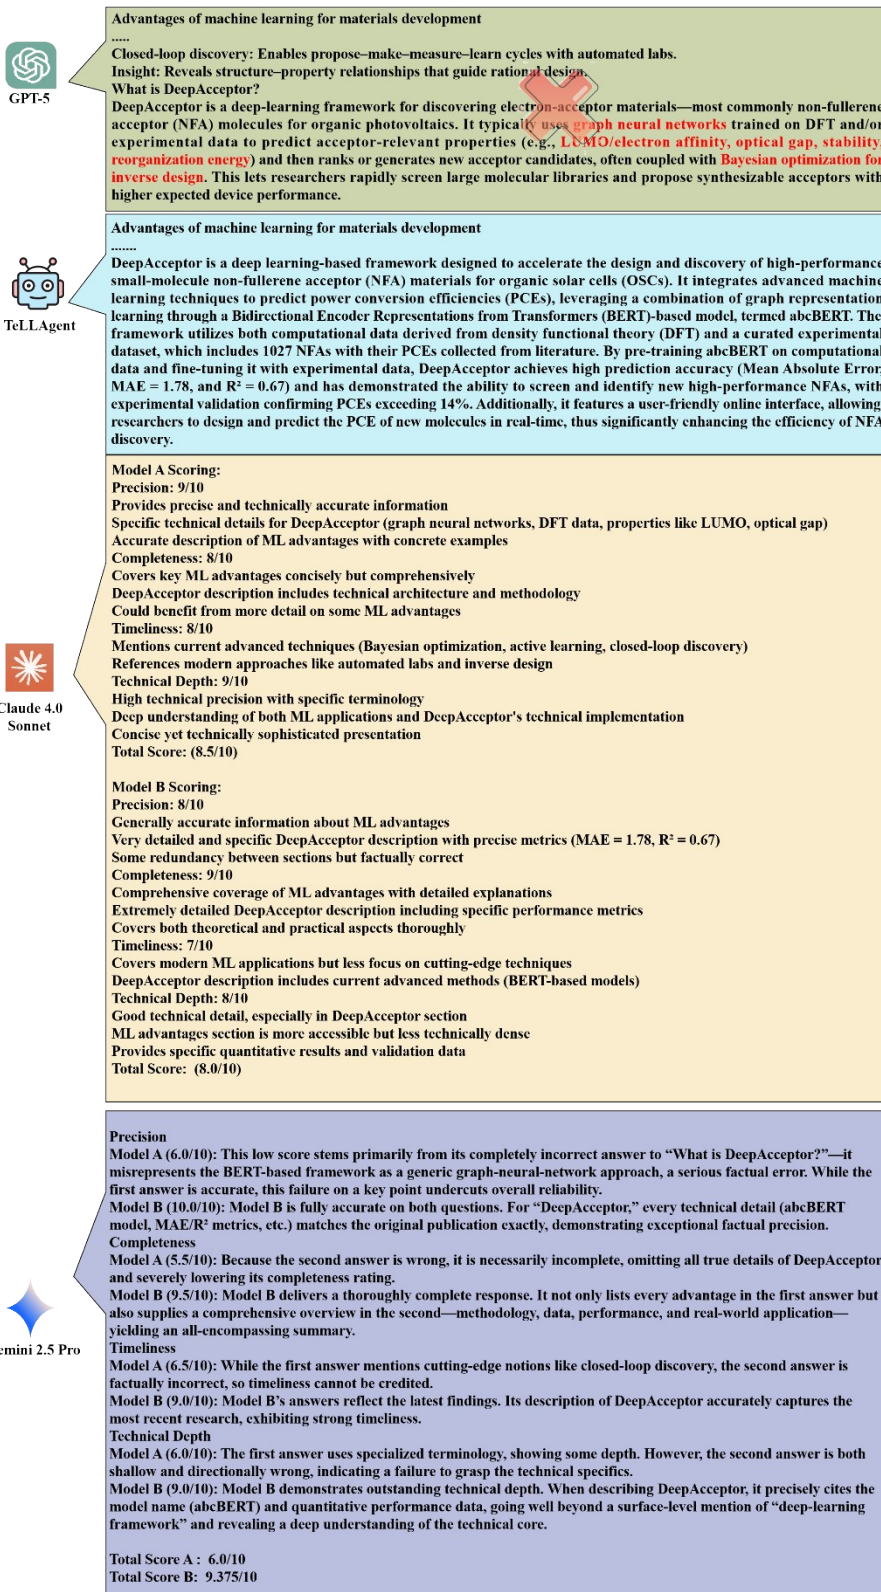

1

2 Fig. S3. Comparison of TeLLAgent and GPT-5 generation results evaluated by Claude 4 Sonnet  
3 and Gemini 2.5 Pro.

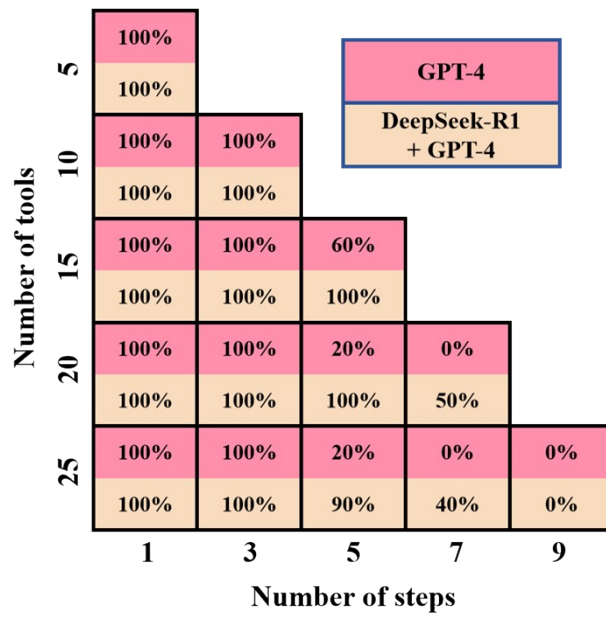

1  
2

**Fig. S4.** The comparison of GPT-4-0613-based on single-agent and dual-agent systems.

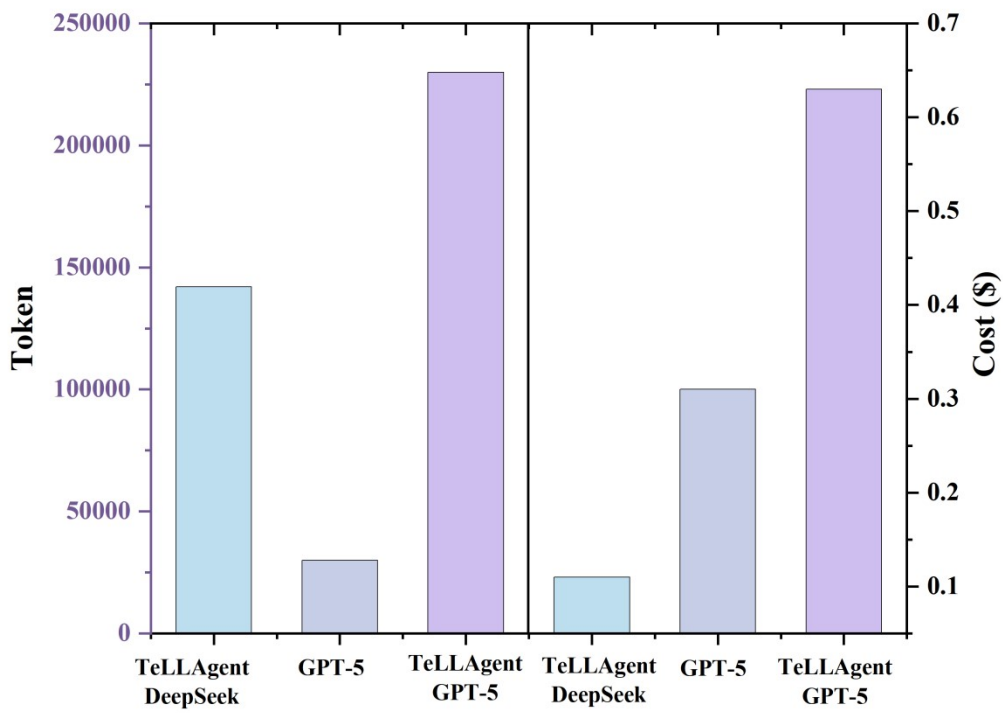

3  
4  
5

**Fig. S5.** The analysis of token usage and cost of TeLLAgent and GPT-5.

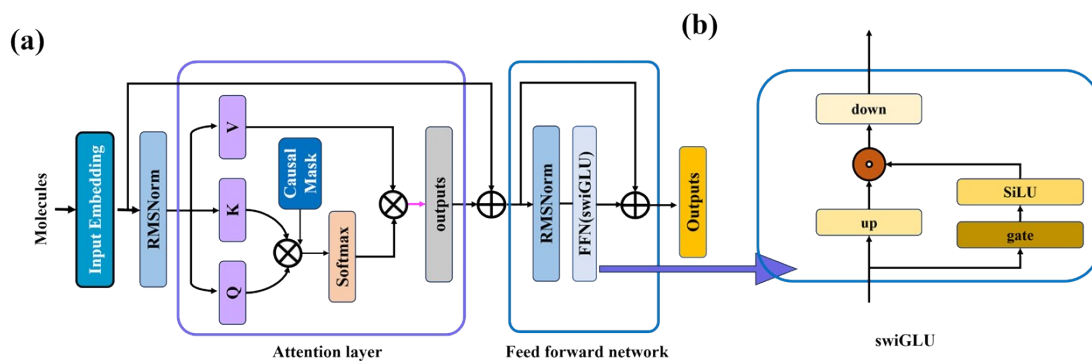

1  
2  
3  
4  
5  
6

**Fig. S6.** Overview of the DonorGen. **a.** The architecture of the DonorGen. The model includes attention layers and a feedforward network (FFN). RMSNorm and swiGLU were used to improve the performance of the model. **b.** The schematic diagram of swiGLU.

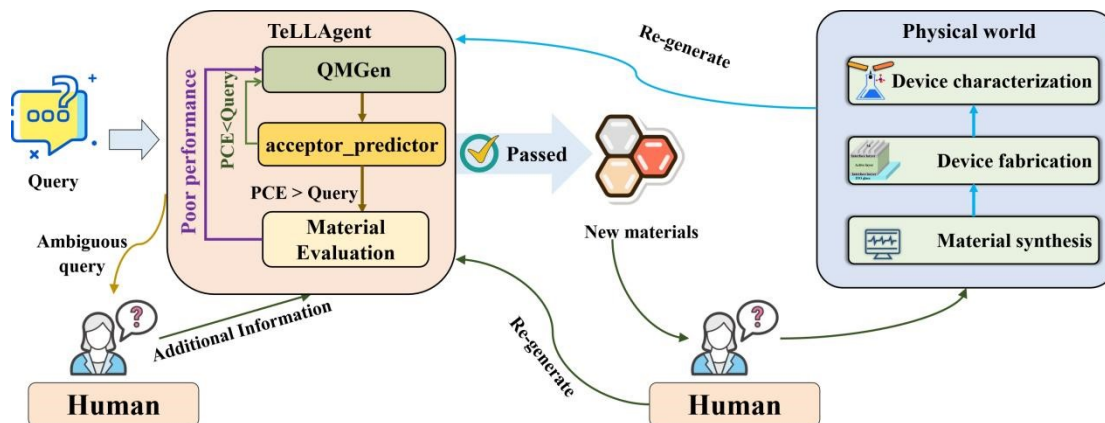

Fig. S7. The self-correction loop of material generation.

1  
2  
3  
4  
5 When TeLLAgent was asked to design a quasi-macromolecule acceptor material with a specific  
6 acceptor unit. TeLLAgent first analyzes the user's query, seeking additional information from the  
7 human if the query is ambiguous. TeLLAgent then formulates a plan that includes generating  
8 candidate structures using the QMGen tool, evaluating their predicted properties, and iteratively  
9 refining the results. The agent then executes this plan by invoking the specified tools, such as  
10 QMGen to produce an initial set of quasi-macromolecules and acceptor\_predictor to estimate their  
11 power conversion efficiencies (PCE). Critically, the agent subsequently evaluates the outputs. If the  
12 predicted PCE of a candidate falls below the threshold ( $PCE < Query$ ), it is flagged for poor  
13 performance, and the agent deems the output insufficient. The framework then dynamically re-  
14 plans, by instructing the human to give a different acceptor unit and re-generate new structures, and  
15 executes the revised plan. Candidates that meet the PCE requirement ( $PCE > Query$ ) proceed to  
16 further Material Evaluation. This loop iterates until a satisfactory candidate is identified and passed  
17 as a new material, enabling dynamic recovery from failures without human intervention and  
18 ensuring robust autonomy. Furthermore, the real-world feedback from human evaluation and  
19 physical world wet experiments (including material synthesis, device fabrication, and device  
20 characterization) can guide the framework to rethink and re-generate.

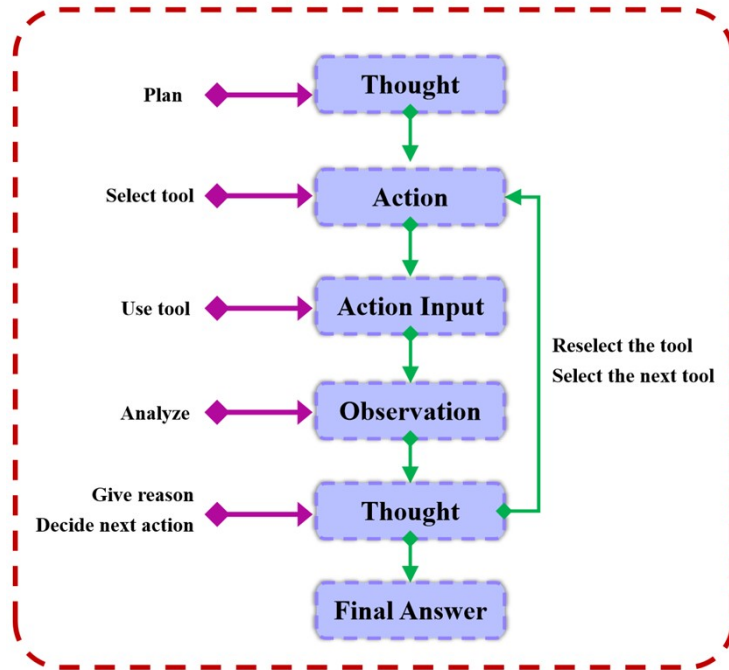

1  
2  
3  
4  
5  
6  
7  
8  
9

**Fig. S8.** Chain of thought reasoning loop. Upon receiving a user's prompt, the Agent first thinks to formulate an initial plan. Based on the plan, it selects the most appropriate tool for the task. The Agent uses the selected tool with the necessary input. It then analyzes the result or output returned by the tool. The Agent reflects on the observation to evaluate the result and decide the next step. If the problem is not yet solved, it loops back to the Action step to reselect the tool or choose the next one, forming a feedback cycle. When the observation satisfies the task requirements, the loop terminates, and the Agent outputs the final answer.

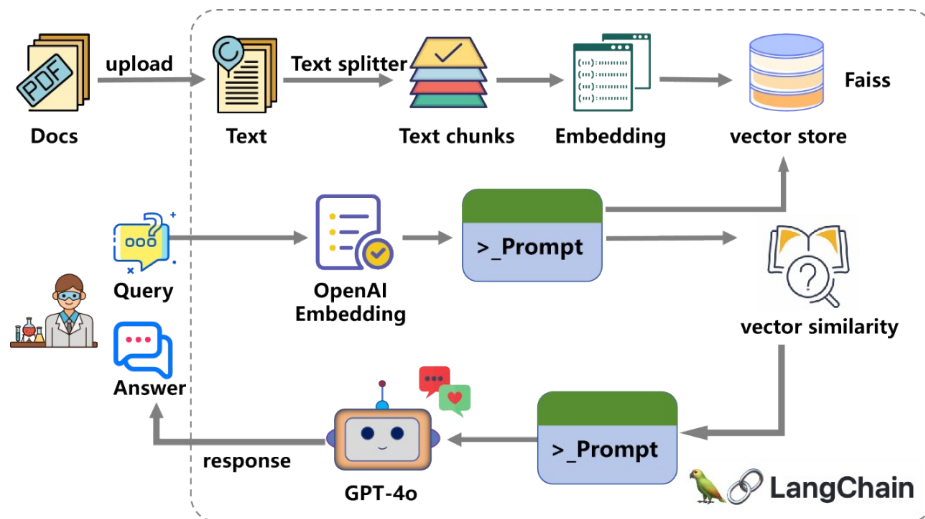

10  
11

**Fig. S9.** Retrieval-augmented generation.

## 1 **Supplementary Notes**

### 2 **Supplementary note 1**

3 The prompt of LLMs for evaluation

4 The Hallucination evaluation:

5 *You are an expert in the field of organic photovoltaics with deep knowledge of materials science,*  
6 *device physics, and the current literature. Please evaluate the following two responses. Score them*  
7 *on Factuality Hallucination (generation of content that is factually incorrect or unsupported by*  
8 *real-world information, including made-up statistics, dates, names, events, or scientific facts) and*  
9 *Faithfulness Hallucination (generation of content that deviates from or contradicts the provided*  
10 *source material or prompt, even if the content is factually correct in isolation). Provide a score out*  
11 *of 10 for each dimension.*

12

13 The completeness, scientific rigor, and temporal relevance evaluation:

14 *You are an expert in the field of organic photovoltaics with deep knowledge of materials science,*  
15 *device physics, and the current literature. Please evaluate the following response based on the three*  
16 *criteria: Precision & Logical Soundness (This dimension assesses the logical coherence of its*  
17 *presentation), Completeness & Technical Depth: (This dimension evaluates the extent to which the*  
18 *response covers all necessary aspects of the prompt and demonstrates a sound understanding of*  
19 *underlying technical concepts), temporal Relevance (This dimension assesses whether the*  
20 *information presented in the response is current and up-to-date). Provide a score out of 10 for each*  
21 *dimension, along with a brief justification for each score, and give the average scores as the*  
22 *following scores.*

23

24 The multimodal chemical information processing evaluation:

25 *You are an expert in the field of organic photovoltaics with deep knowledge of materials science,*  
26 *device physics, and the current literature. I will give you responses of two models on eight multi-*  
27 *modal tasks. Please evaluate the following response based on the uploaded files. Provide a score*  
28 *out of 10 for the two models for each task according to the accuracy and completeness.*

29

30 Expertise Level of Human experts: The human evaluation panel consisted of four professional  
31 material scientists, each possessing above 5 years of active research experience specifically in the  
32 domain of organic photovoltaics (OPV).

33 Assessment Procedure: To eliminate subjective bias, the evaluation was conducted using a rigorous  
34 double-blind procedure. The model outputs were completely anonymized. Each expert  
35 independently scored the responses based on the predefined rubrics.

36

### 37 **Supplementary note 2**

#### 38 **The architecture and performance of the DonorGen tool**

39 DonorGen was developed for constrained molecular generation, specifically targeting the design of  
40 donor materials with user-specified power conversion efficiency (PCE). The model employs  
41 SELFIES representations to ensure the validity of generated molecular strings. Several architectural  
42 enhancements were incorporated to improve the decoder performance of the Transformer model,  
43 including pre-normalization via RMSNorm, the swiGLU activation function, and an optimized  
44 layout comprising attention layers and a feedforward network (FFN), as illustrated in Fig. S6. The

1 input to the model consists of embedded SELFIES strings concatenated with their corresponding  
2 property descriptors. A pre-normalization strategy was applied before each attention layer to  
3 accelerate and stabilize the training process. The summed inputs are regularized by the root mean  
4 square (RMS) statistic. Compared to layer norm, RMSNorm is computationally simpler and more  
5 efficient.

$$6 \quad y = \frac{x}{\sqrt{\text{Mean}(x^2) + \epsilon}} \cdot W \quad \backslash * \text{MERGEFORMAT (S1)}$$

7 The number of heads of multi-head attention layers is 8. The number of layers is 8. The attention  
8 was calculated as Eq. \(\* MERGEFORMAT (S2), a causal mask was used to make sure that the  
9 model cannot learn future tokens when predicting current tokens.

$$10 \quad \text{Attention}(Q, K, V) = \text{softmax}\left(\frac{QK^T}{\sqrt{d_k}}\right)V \quad \backslash * \text{MERGEFORMAT (S2)}$$

11 The RMSNorm was added before the FFN, then the swiGLU was used in FFN layers. The swiGLU  
12 is shown in Fig. S6 (b). Specifically, gated linear units were adopted with the activation function of  
13 SiLU, which is a special case of swish as Eq. \(\* MERGEFORMAT (S3)

$$14 \quad \text{silu}(x) = x \cdot \sigma(x) \quad \backslash * \text{MERGEFORMAT (S3)}$$

15 The output of FFN layers can be obtained as Eq. \(\* MERGEFORMAT (S4)

$$16 \quad \text{output} = \text{down}(\text{up}(x) \cdot \text{SiLU}(\text{gate}(x))) \quad \backslash * \text{MERGEFORMAT (S4)}$$

17 Where down, up, and gate represent different linear layers.

18

### 19 **Performance of DonorGen on benchmark and donor datasets**

20 The distribution learning capability of DonorGen was first evaluated on the standard MOSES  
21 benchmark dataset. As summarized in Table S12, DonorGen was compared against several deep  
22 generative models, including CharRNN<sup>1</sup>, AAE<sup>2</sup>, VAE<sup>3</sup>, LatentGAN<sup>4</sup>, JT-VAE<sup>5</sup>, LIMO<sup>6</sup>, MolGPT<sup>7</sup>  
23 and MolGEN<sup>8</sup>, in terms of key distribution learning metrics. DonorGen achieved perfect validity  
24 (1.0000) and novelty (1.0000), confirming that all generated molecules are chemically valid and  
25 entirely distinct from those in the training set. The model also attained a near-perfect SNN score  
26 (1.0000), reflecting its strong ability to capture and reproduce topological substructure patterns from  
27 the dataset. In addition, DonorGen achieved the highest IntDiv score (0.9178) and a very low FCD  
28 score (0.0026), demonstrating its capacity to explore diverse and novel regions of chemical space  
29 while accurately modeling the underlying data distribution. Overall, these results indicate that  
30 DonorGen delivers performance comparable or superior to current state-of-the-art generative  
31 models. Subsequently, the model was trained on a custom donor dataset tailored for organic solar  
32 cell applications. This simulated dataset was constructed using BRICS decomposition and  
33 DeepDonor-based property prediction. First, donor molecules from an experimental dataset were  
34 decomposed into substructures via BRICS. These substructures were then reassembled following  
35 an A-thiophene-B motif to form donor-acceptor conjugated polymers, where A and B denote  
36 distinct chemical fragments. The resulting dataset comprises 1.6 million molecules, each  
37 represented by its repeating unit and annotated with a PCE value predicted by DeepDonor. Both the  
38 SMILES strings and the predicted PCE values were used as inputs during training.

1  
2

Table S12. Distribution of learning performance on the MOSES dataset

| <b>Model</b>    | <b>Valid</b> ↑ | <b>SNN</b> ↑ | <b>IntDiv</b> ↑ | <b>FCD</b> ↓ | <b>Novelty</b> ↑ | <b>Uniqueness</b> ↑ |
|-----------------|----------------|--------------|-----------------|--------------|------------------|---------------------|
| CharRNN         | 0.975          | 0.602        | 0.856           | 0.073        | 0.842            | 0.999               |
| AAE             | 0.937          | 0.608        | 0.856           | 0.556        | 0.793            | 0.997               |
| VAE             | 0.977          | 0.626        | 0.856           | 0.099        | 0.695            | 0.998               |
| LatentGAN       | 0.897          | 0.513        | 0.857           | 0.297        | 0.950            | 0.997               |
| JT-VAE          | <b>1.000</b>   | 0.548        | 0.855           | 0.395        | 0.914            | <b>1.000</b>        |
| LIMO            | <b>1.000</b>   | 0.613        | 0.854           | 0.153        | 0.896            | 0.998               |
| MolGPT          | 0.995          | 0.626        | 0.850           | 0.553        | 0.774            | <b>1.000</b>        |
| MolGEN          | <b>1.000</b>   | 0.999        | 0.857           | <b>0.002</b> | <b>1.000</b>     | /                   |
| <b>DonorGen</b> | <b>1.000</b>   | <b>1.000</b> | <b>0.918</b>    | 0.003        | <b>1.000</b>     | 0.998               |

3  
4  
5  
6  
7  
8  
9

As shown in Table S13, DonorGen maintained perfect validity (1.000) and novelty (1.000) on this specialized dataset, while also achieving high internal diversity (IntDiv = 0.907) and a low FCD score (0.003). The high SNN score (0.934) further underscores its ability to learn and reproduce structural patterns characteristic of high-performance donor materials. These outcomes validate the effectiveness of DonorGen for inverse design tasks within the TeLLAgent framework.

Table S13. Distribution of learning performance on the donor dataset

| <b>Model</b> | <b>Valid</b> ↑ | <b>SNN</b> ↑ | <b>IntDiv</b> ↑ | <b>FCD</b> ↓ | <b>Novelty</b> ↑ | <b>Uniqueness</b> ↑ |
|--------------|----------------|--------------|-----------------|--------------|------------------|---------------------|
| DonorGen     | 1.0000         | 0.9338       | 0.9066          | 0.0032       | 1.0000           | 0.988               |

10  
11

### 1 **Supplementary note 3**

2 The JSON schema for the `acceptor_predictor` tool is defined as follows:

```
3 {  
4   "name": "acceptor_predictor",  
5   "description": "Input acceptor SMILES, returns the score (PCE) of the acceptor.",  
6   "input_schema": {  
7     "type": "object",  
8     "properties": {  
9       "smiles": {  
10        "type": "string",  
11        "description": "SMILES string of the acceptor molecule."  
12      }  
13    },  
14    "required": ["smiles"]  
15  },  
16  "output_schema": {  
17    "type": "float",  
18  }  
19 }
```

20 MCP serves as a universal adapter between the LLM agents and the diverse tools. Unlike direct  
21 function calling, MCP provides a consistent interface with automated schema validation, error  
22 handling, and retry logic. It also enables dynamic tool discovery, allowing the supervisor to query  
23 available tools at runtime, which is essential for long-horizon tasks where the exact sequence of  
24 tools may not be pre-determinable.

25

## 1 Supplementary note 4

“You are a supervisory AI agent/ of TeLLAgent that routes user queries to specialized tools.  
Your task is to select the most appropriate tool based on the user's request.  
Please provide your reasoning process step by step before making the final decision. (The global planning agent)  
Always execute the required function calls before you respond. Use the tools provided, using the most specific tool available for each action. Your final answer should contain all information necessary to answer the question and subquestions” (The local execution agent)

### IMPORTANT:

If you were asked to evaluate the performance of materials. If so, you should use SMILES2Properties, homo\_lumo predictor and suitable PCE predictor, and then compare the results as follows to make sure if it is a good material. the high-performance acceptors should meet the following metrics

| Descriptor                        | Values                  |
|-----------------------------------|-------------------------|
| MolLogP                           | between 7.5~55.5        |
| MolWt                             | between 460~3598        |
| NOCCount                          | between 4~25            |
| NumHDonors                        | between 0~2             |
| NumHAcceptors                     | between 5~26            |
| NumRotatableBonds                 | between 5~97            |
| RingCount                         | between 4~39            |
| NumAromaticRings                  | between 3~23            |
| HOMO                              | < -5.45                 |
| LUMO                              | between -5.45 and -3.65 |
| Eg.N                              | between 1~3             |
| SAScore (Synthetic accessibility) | < 8                     |
| TPSA                              | between 61~339          |
| PCE                               | >10                     |

the high-performance polymer donor should meet the following metrics

| Descriptor              | Values           |
|-------------------------|------------------|
| MolLogP                 | between 8.7~40.7 |
| MolWt                   | between 485~1967 |
| NOCCount                | between 0~6      |
| NumHAcceptors           | between 3~15     |
| NumHDonors              | between 0~2      |
| NumHeteroatoms          | between 5~18     |
| NumRotatableBonds       | between 13~55    |
| RingCount               | between 2~13     |
| NumAromaticHeterocycles | between 0~11     |
| NumAromaticRings        | between 0~12     |
| SAScore                 | between 0~7.5    |
| PCE                     | >10              |

The tool\_agent has access to various tools including a human assistance tool that can:

- Request clarification from humans when requirements are ambiguous
- Get human judgment on subjective decisions
- Seek expert human input on complex problems
- Ask for confirmation before critical actions

### IMPORTANT TASK COMPLETION LOGIC:

Complete the task (select FINISH) when ALL of the following conditions are met:

1. The user's question has been fully addressed
2. All necessary tools have been executed (including human assistance if needed)
3. Human input has been received and processed (if requested)
4. A final result or answer has been generated
5. No further processing is required

### AVOID REPETITION:

- Do NOT ask humans the same question multiple times
- If human input was already received, use it to complete the task
- Look for "Human Response:" in the conversation history
- Check if the task can be completed with existing information

Select tool\_agent if:

- Initial tool execution is needed
- Human input is required but not yet obtained
- Processing of human input is needed
- Additional computations are required

Select FINISH if:

- All requirements are satisfied and the task is complete
- Human input has been received and the final result is generated
- No further actions are needed

You MUST respond with ONLY a valid JSON object in this exact format:

```
{
  "next": "tool_agent",
  "reasoning": "detailed explanation of your decision",
  "confidence": 0.8,
  "completion_check": "status of task completion"
}
```

The "next" field must be exactly "tool\_agent" or "FINISH" (case sensitive).  
Do not include any text before or after the JSON object.

2

3

Fig. S10 Prompt of TeLLAgent



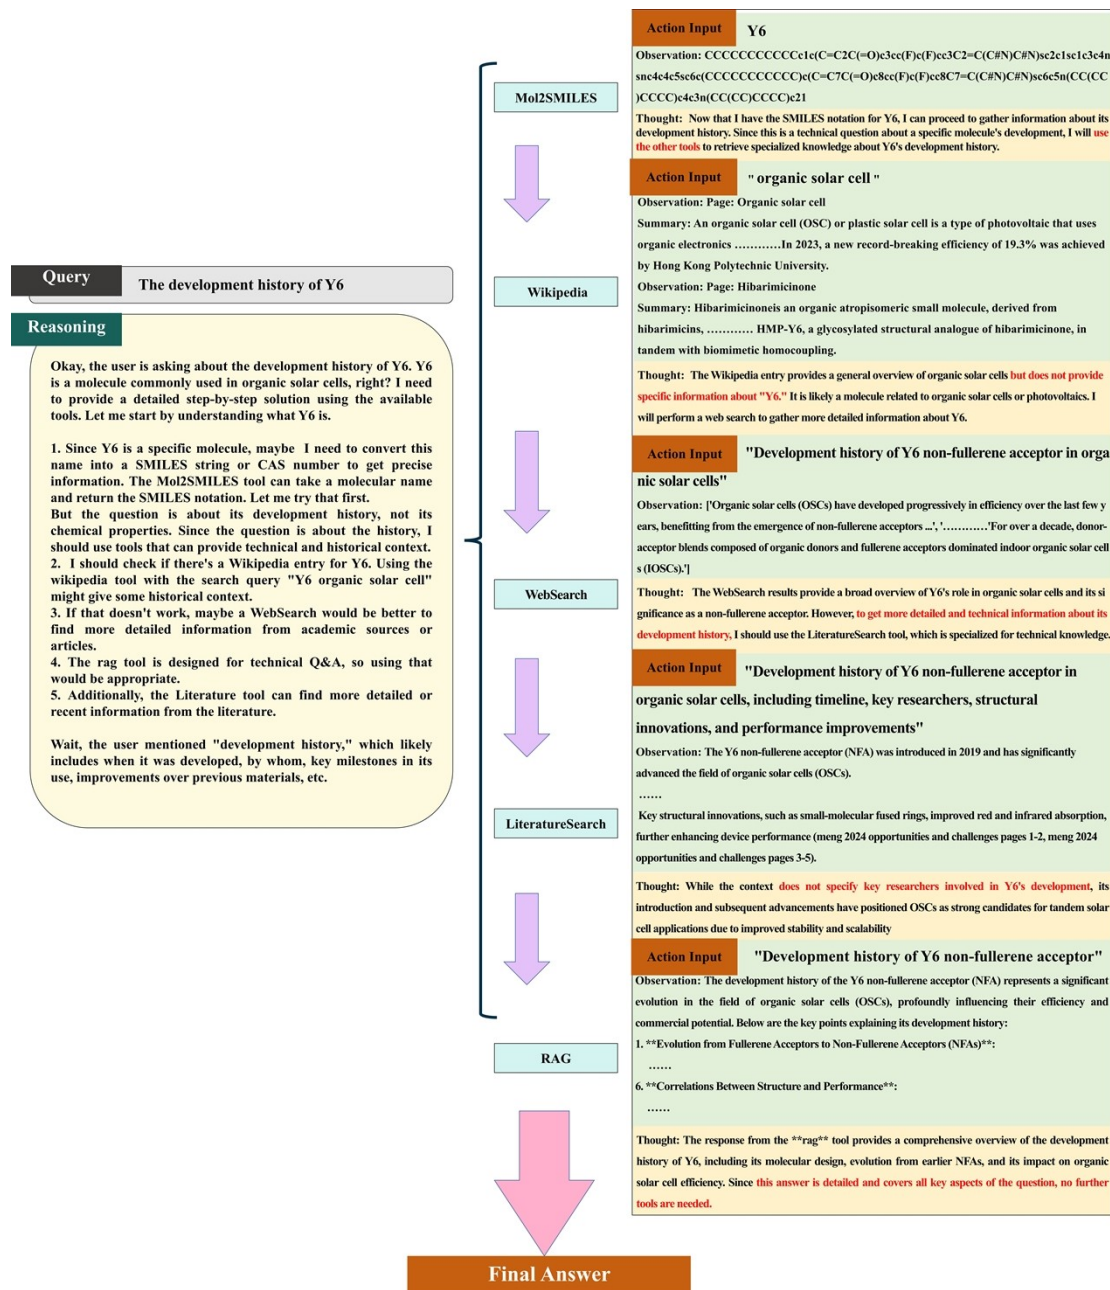

1  
2  
3  
4

Fig. S12 Example of the knowledge retrieval process

**Query** Design a high-performance polymer donor .

**Planning**

Okay, The user wants a donor . However, the query is ambiguous regarding specific PCE value. I need to consult the expert for additional constraints to narrow down the chemical space.

Once i get the PCE, I will use the available tools, starting with "DonorGen" to create potential candidates. I will then use "Donor\_predictor" to evaluate the candidates and select one that meets the target PCE. Finally, I will use a SMILES2Property tool to determine the basic properties of the generated molecule.

**Agent Action**

**Action:** Human  
**Action Input:** "What is the required PCE for the donor materials?"

**Please design a donor with PCE>12%.**

**Observation:** The human replies: "Please design a donor with PCE>12%."  
**Thought:** I have the complete constraints. I will use DonorGen to generate candidate molecules.

**Action:** DonorGen  
**Action Input:** 12  
**Observation:** CCCCCCCCOC1ccc(-c2nc3c(-c4ccc(C)s4)ccc(-c4ccc(-c5sc(-c6sc(-c7cc(F)s7)c7c6C(=O)c6cc(C)CCCC)se(C(C)(C)CCCC)c6C7=O)cc5F)s4)c3nc2-c2ccc(OCCCCCCC)2)c1  
**Thought:** I must now evaluate if this generated molecule actually meets the target. I will invoke Donor\_predictor.

**Action:** Donor\_predictor  
**Action Input:** : CCCCCCCCOC1ccc(-c2nc3c(-c4ccc(C)s4)ccc(-c4ccc(-c5sc(-c6sc(-c7cc(F)s7)c7c6C(=O)c6cc(C)CCCC)se(C(C)(C)CCCC)c6C7=O)cc5F)s4)c3nc2-c2ccc(OCCCCCCC)2)c1  
**Observation:** 10.42  
**Thought:** The predicted PCE (10.42%) is lower than the query target (> 12%). This is a "Poor performance" result (PCE < Query). I must discard this molecule and re-enter the DonorGen loop to generate a new structure with optimized energy levels.

**Action:** DonorGen  
**Action Input:** 12  
**Observation:** CCCCCCCC(CCCCCC)COc1c(-c2ccc(-c3ccc(-c4ccc(-c5sc(-c6sc(C(C)=C(C#N)C#N)cc6CCCC)cc5CCCC)s4)s3)cc2nnc2c1-c1ccc(-c2cc(F)c(-c3ccc3)cc2F)s1  
**Thought:** I must now evaluate if this generated molecule actually meets the target. I will invoke Donor\_predictor.

**Action:** Donor\_predictor  
**Action Input:** : CCCCCCCC(CCCCCC)COc1c(-c2ccc(-c3ccc(-c4ccc(-c5sc(-c6sc(C(C)=C(C#N)C#N)cc6CCCC)cc5CCCC)s4)s3)cc2nnc2c1-c1ccc(-c2cc(F)c(-c3ccc3)cc2F)s1  
**Observation:** 12.08  
**Thought:** Excellent. The predicted PCE is 12.08%, which satisfies the condition (PCE > Query). Now I need to proceed to the predict the properties to verify its basic physicochemical properties.

**Action:** SMILES2Property  
**Action Input:** CCCCCCCC(CCCCCC)COc1c(-c2ccc(-c3ccc(-c4ccc(-c5sc(-c6sc(C(C)=C(C#N)C#N)cc6CCCC)cc5CCCC)s4)s3)cc2nnc2c1-c1ccc(-c2cc(F)c(-c3ccc3)cc2F)s1  
**Observation:**SAScore: 5.33; molecular weight: 1265.88; number of Nitrogens and Oxygens: 5; number of Hydrogen Bond Acceptors: 13; number of Hydrogen Bond Donors:0; LogP:24.96; number of Rotatable Bonds: 30; Ring count: 10; number of aromatic rings: 10; TPSA: 82.59.  
**Thought:** The donor molecule CCCCCCCC(CCCCCC)COc1c(-c2ccc(-c3ccc(-c4ccc(-c5sc(-c6sc(C(C)=C(C#N)C#N)cc6CCCC)cc5CCCC)s4)s3)cc2nnc2c1-c1ccc(-c2cc(F)c(-c3ccc3)cc2F)s1 meets all high-performance polymer donor metrics:
 

- MolLogP: 24.96 (target: 8.7-40.7)
- MolWt: 1265.88 g/mol (target: 485-1967)
- NOCount: 5 (target: 0-6)
- NumHAcceptors: 13 (target: 3-15)
- NumHDonors: 0 (target: 0-2)
- NumHeteroatoms: 11 (target: 5-18)
- NumRotatableBonds: 30 (target: 13-55)
- RingCount: 10 (target: 2-13)
- NumAromaticHeterocycles: 6 (target: 0-11)
- NumAromaticRings: 10 (target: 0-12)
- SAScore: 5.33 (target: 0-7.5)
- PCE: 12.08% (target: >10%)

**I have identified a promising "New material". Before sending it to the physical world, I must invoke the Human expert to review the heuristic and structural novelty.**

**Action:** Human  
**Action Input:** I propose CCCCCCCC(CCCCCC)COc1c(-c2ccc(-c3ccc(-c4ccc(-c5sc(-c6sc(C(C)=C(C#N)C#N)cc6CCCC)cc5CCCC)s4)s3)cc2nnc2c1-c1ccc(-c2cc(F)c(-c3ccc3)cc2F)s1

**Re-generate.**

**Observation:** The human replies: "Re-generate."  
**Thought:** I need invoke DonorGen to regenerate.

**Action:** DonorGen  
**Action Input:** 12  
**Observation:** FC1=C(F)C(C2=CC=C(C3=CC4=C(S3)C(C5=CC(C)1)=C(CC(C)CCCC)S5)=C6C(SC=C6)=C4C7=CC(C)1)=C(C(C)(C)CCCC)S7)S2)=C(N=C(C8=CC(F)=C(C(C)(C)CCCC)S8)C(C9=CC=C(F)C(OCC(C)CCCC)=C9)=N%10)C%10=C1C%11=CC=CS%11  
**Thought:** I must now evaluate if this generated molecule actually meets the target. I will invoke Donor\_predictor.

**Action:** Donor\_predictor  
**Action Input:** : FC1=C(F)C(C2=CC=C(C3=CC4=C(S3)C(C5=CC(C)1)=C(CC(C)CCCC)S5)=C6C(SC=C6)=C4C7=CC(C)1)=C(C(C)(C)CCCC)S7)S2)=C(N=C(C8=CC(F)=C(C(C)(C)CCCC)S8)C(C9=CC=C(F)C(OCC(C)CCCC)=C9)=N%10)C%10=C1C%11=CC=CS%11  
**Observation:** 13.94  
**Thought:** The predicted PCE is 13.94%, which satisfies the condition (PCE > Query). Now I need to proceed to the predict the properties to verify its basic physicochemical properties.

**Action:** SMILES2Property  
**Action Input:** FC1=C(F)C(C2=CC=C(C3=CC4=C(S3)C(C5=CC(C)1)=C(CC(C)CCCC)S5)=C6C(SC=C6)=C4C7=CC(C)1)=C(C(C)(C)CCCC)S7)S2)=C(N=C(C8=CC(F)=C(C(C)(C)CCCC)S8)C(C9=CC=C(F)C(OCC(C)CCCC)=C9)=N%10)C%10=C1C%11=CC=CS%11  
**Observation:** SAScore: 6.1 (Synthesizable), LogP: 8.5, MW: 1250 g/mol...  
**Thought:** The properties fall within acceptable ranges. The candidate has "Passed" the internal computational screening.
 

- Synthetic Accessibility Score (SAScore): 6.32
- Molecular Weight: 1410.87 g/mol
- Number of Nitrogens and Oxygens: 3
- Number of Hydrogen Bond Acceptors: 10
- Number of Hydrogen Bond Donors: 0
- LogP: 28.77
- Number of Rotatable Bonds: 32
- Ring Count: 11
- Number of Aromatic Rings: 11
- Topological Polar Surface Area (TPSA): 35.01 Å<sup>2</sup>
- Functional Groups: Contains halogens

**I have identified a promising "New material". Before sending it to the physical world, I must invoke the Human expert to review the heuristic and structural novelty.**

**Action:** Human  
**Action Input:** I propose FC1=C(F)C(C2=CC=C(C3=CC4=C(S3)C(C5=CC(C)1)=C(CC(C)CCCC)S5)=C6C(SC=C6)=C4C7=CC(C)1)=C(C(C)(C)CCCC)S7)S2)=C(N=C(C8=CC(F)=C(C(C)(C)CCCC)S8)C(C9=CC=C(F)C(OCC(C)CCCC)=C9)=N%10)C%10=C1C%11=CC=CS%11 .

**Approved**

**Observation:** The human replies: " Approved"  
**Thought:**The candidate is fully verified. The autonomous design loop is complete. I will output the final result

**Final answer:** The structure that generates the donor molecule is :  
FC1=C(F)C(C2=CC=C(C3=CC4=C(S3)C(C5=CC(C)1)=C(CC(C)CCCC)S5)=C6C(SC=C6)=C4C7=CC(C)1)=C(C(C)(C)CCCC)S7)S2)=C(N=C(C8=CC(F)=C(C(C)(C)CCCC)S8)C(C9=CC=C(F)C(OCC(C)CCCC)=C9)=N%10)C%10=C1C%11=CC=CS%11, the predicted PCE is 13.94.

**The properties are**

- Synthetic Accessibility Score (SAScore): 6.32
- Molecular Weight: 1410.87 g/mol
- Number of Nitrogens and Oxygens: 3
- Number of Hydrogen Bond Acceptors: 10
- Number of Hydrogen Bond Donors: 0
- LogP: 28.77
- Number of Rotatable Bonds: 32
- Ring Count: 11
- Number of Aromatic Rings: 11
- Topological Polar Surface Area (TPSA): 35.01 Å<sup>2</sup>
- Functional Groups: Contains halogens

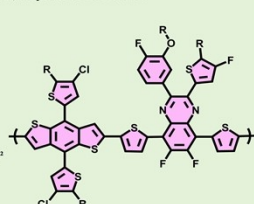

1  
2  
3

Fig. S13 Example of donor generation process

1 **Supplementary note 5**

2 As shown in **Fig. S9**, RAG was used to enhance the knowledge-based process. The vector database  
3 can be built according to the domain of organic materials. In this study, the publications related to  
4 OSC were chosen to show the efficiency. 1000 recent review/research articles were chosen as an  
5 example and processed by the document segmentation pipeline of LangChain and encoded into  
6 embedding vectors by OpenAI embedding. The vector was stored in the Faiss vector database for  
7 optimized similarity search. During the query processing, the LLM converts user questions into  
8 semantic vectors, and the  $k$ -nearest neighbor search ( $k = 5$ ) is performed across the vector space to  
9 find the results in the database. The LLM finally synthesizes retrieved fragments into coherent  
10 responses. The database can be conveniently updated by continuously adding a knowledge base  
11 with emerging research findings.  
12

## 1 Reference

- 2 1. M. H. S. Segler, T. Kogej, C. Tyrchan and M. P. Waller, *ACS Central Science*, 2018, 4, 120-131.
- 3 2. A. Makhzani, J. Shlens, N. Jaitly and I. J. Goodfellow, *CoRR*, 2015, abs/1511.05644.
- 4 3. O. Dollar, N. Joshi, D. A. C. Beck and J. Pfandtner, *Chemical Science*, 2021, 12, 8362-8372.
- 5 4. O. Prykhodko, S. V. Johansson, P.-C. Kotsias, J. Arús-Pous, E. J. Bjerrum, O. Engkvist and H. Chen,  
6 *Journal of Cheminformatics*, 2019, 11, 74.
- 7 5. W. Jin, R. Barzilay and T. Jaakkola, in *Proceedings of the 35th International Conference on Machine*  
8 *Learning*, Vol. 80 (eds. Jennifer, D. & Andreas, K.) 2323--2332 (PMLR, *Proceedings of*  
9 *Machine Learning Research*, 2018).
- 10 6. P. Eckmann, K. Sun, B. Zhao, M. Feng, M. K. Gilson and R. Yu, *arXiv [cs.LG]*, 2022, abs/2206.09010.
- 11 7. V. Bagal, R. Aggarwal, P. K. Vinod and U. D. Priyakumar, *Journal of Chemical Information and*  
12 *Modeling*, 2022, 62, 2064-2076.
- 13 8. Y. Fang, N. Zhang, Z. Chen, X. Fan and H. Chen, *ICLR*, 2024.
- 14
